# Supplementary material
Source: ML conference proceedings conference paper supplement (https://proceedings.neurips.cc/paper_files/paper/2020/hash/c21f4ce780c5c9d774f79841b81fdc6d-Abstract.html)
Supplement: Supplementary file [file c21f4ce780c5c9d774f79841b81fdc6d-Supplemental.zip]

---

# End-to-End Learning and Intervention in Games

---

**Jiayang Li**

Northwestern University  
jiayangli2024@u.northwestern.edu

**Jing Yu**

Northwestern University  
jingyu2021@u.northwestern.edu

**Yu (Marco) Nie**

Northwestern University  
y-nie@northwestern.edu

**Zhaoran Wang**

Northwestern University  
zhaoranwang@gmail.com

## Abstract

In a social system, the self-interest of agents can be detrimental to the collective good, sometimes leading to social dilemmas. To resolve such a conflict, a central designer may *intervene* by either redesigning the system or incentivizing the agents to change their behaviors. To be effective, the designer must anticipate how the agents react to the intervention, which is dictated by their often unknown payoff functions. Therefore, *learning* about the agents is a prerequisite for intervention. In this paper, we provide a unified framework for learning and intervention in games. We cast the equilibria of games as individual layers and integrate them into an *end-to-end* optimization framework. To enable the backward propagation through the equilibria of games, we propose two approaches, respectively based on explicit and implicit differentiation. Specifically, we cast the equilibria as the solutions to *variational inequalities* (VIs). The explicit approach unrolls the projection method for solving VIs, while the implicit approach exploits the sensitivity of the solutions to VIs. At the core of both approaches is the differentiation through a projection operator. Moreover, we establish the correctness of both approaches and identify the conditions under which one approach is more desirable than the other. The analytical results are validated using several real-world problems.

## 1 Introduction

The history of human societies may be viewed as an evolutionary process through which countless self-interested individuals learn to cooperate with each other [20]. While human self-interest can be channeled towards socially desirable ends, interventions—in the form of laws, social norms and incentives—are often required. Indeed, even the “invisible hand” of Adam Smith would not work without proper regulations and policing. This process continues, as it uncovers and resolves previously unknown or non-existent conflicts between self- and collective interest. For example, the potential conflict between overpopulation and welfare states has been heatedly debated among biologists, social scientists, philosophers and alike [21, 16]. In economics, externalities (a.k.a. neighboring effects) lead to market failures because self-interested agents do not bear the cost/benefit of their actions in its entirety. Lloyd’s common devastated by excessive grazing [34] and Pigou’s road jammed by selfish drivers [50] are two classical examples. More recently, Braess [10] shows expanding a road network could worsen traffic congestion. This paradoxical phenomenon, related closely to the price of anarchy [28], demonstrates vividly how unregulated self-interest may be detrimental to the social good. In this paper, we develop a general framework aiming to regulate various systems comprised of self-interested agents.

*Game theory* is often used to determine the most likely outcomes of a system in which agents pursue self-interest and interact with each other [27, 18]. Although a game-theoretic model of the real-world

is a simplification, it can be useful for not only explaining and predicting system outcomes, but also engineering desired ones [43]. For example, many phenomena in ecosystems can be explained as the outcome of the population, in the game of survival, adopting an *evolutionarily stable strategy* [55]. Stackelberg games [61], which concern the strategic interactions between leaders and followers, have seen applications in economics [5], national security [51] and environment protection [65]. Congestion game [52], in which the utility of agents depends on a resource whose cost increases with the number of users, is another example. Many social and engineering systems can be modeled as a congestion game, with applications ranging from planning transportation infrastructure [6], managing wireless communication networks [30], to operating ride-hail companies [12].

In a game-theoretic system, we define the central designer as an authority whose action can influence the outcome of the game. The central designer can *intervene* in order to guide the self-interested behavior toward a socially desirable outcome. There are generally two types of interventions: redesign the system or modify the payoffs of the agents through incentives. Take transportation planning as example. To alleviate congestion, the owner of the road network (typically the “government”), has the power to add capacities at selected locations in the network [37, 64]. Alternatively, it may charge road users a “congestion toll”, in the spirit of Pigou [50] and Vickrey [60], to incentivize them to change travel behaviors (route, departure time, mode, etc.). In order to intervene effectively, the central designer must anticipate the reaction of the agents, which is dictated by their often *unknown* payoff functions. Thus, an equally important task is to infer, from empirical observations, how the agents evaluate their payoffs. To this end, the random utility theory [41] is widely used to estimate behavioral parameters of agents in marketing [40], environmental studies [59] and travel forecasting [7]. Alternatively, the learning-theoretic approach is increasingly used to learn, among other things, the optimal strategy of agents [32] or unknown parameters of games [33].

**Contribution.** This paper provides a unified framework for learning and interventions in games. It is well known that the equilibria of many games can be formulated as either a complementarity problem [66] or an optimization problem [45], and both can be interpreted as a variational inequality (VI) problem [47]. Therefore, we propose to cast the equilibria of games, in the form of VI, as individual layers in an end-to-end optimization framework. Such a general representation of the game-theoretic system in an end-to-end framework poses the challenge of performing forward and backward propagation through the VI layers.

Along the above line, our contributions are as follows. (1) We present a unified optimization model for learning and interventions in games that can be solved by gradient descent methods. (2) We devise a Newton’s method for forward propagation over VI layers. Unlike other Newton-type methods for solving VI, e.g. [8, 56], we directly find the solution via root-finding. (3) We propose two methods for backward propagation over VI layers based on explicit and implicit differentiation, respectively. The explicit approach unrolls the projection methods for solving VIs, and the implicit approach performs differentiation on the fixed-point formulation of VI [26]. The implicit approach is more efficient than the explicit approach but is applicable only when the VI problem is strongly monotone locally. In contrast, the explicit approach works as long as the convergence of the projection method is guaranteed, which only requires monotonicity. (4) We give real-world examples to demonstrate the potential applications of the proposed framework.

**Related Work.** Interventions in games can be modeled as mathematical programs with equilibrium constraints (MPEC), a class of optimization problems constrained by equilibrium conditions, often represented as a VI problem [35]. As our framework casts the equilibria of games as individual layers, it may be viewed as a special class of MPEC. Solving MPEC typically requires calculating the derivatives of the equilibria [19], which is a significant challenge. Another difficulty has to do with the lack of unique equilibrium, a requirement for differentiability [49]. Besides the MPEC approach, recent work also casts the intervention in games as a bi-level reinforcement learning (RL) problem, in which the agents’ decision is modeled as a Markov decision process [67].

Learning payoff parameters in games usually relies on the special structures of games [62, 9]. Ling et al. [33] studied how to learn a normal form game using a differentiable game solver layer in an end-to-end framework. The convergence and sensitivity analysis in network games [48] is another example that enable treating game solvers as individual layers. As VI provides a unified formulation for various equilibrium problems arising from games, our work can be regarded as a generalization of these works.

To inject an appropriate inductive bias into the modeling procedure, recent work shows the possibility of embedding differentiable optimization problems as layers in an end-to-end framework [1]. To differentiate through an optimization problem, one could either unroll the numerical computation [17, 4] or implicitly differentiate the optimality conditions, such as the KKT conditions in quadratic programs (QP) [3], the Pontryagin minimum principle in optimal control problems [25], and the Euler-Lagrange equations in least-action problems [36]. As the solution to a VI problem can usually be characterized as a fixed-point equation via a projection operator, which is equivalent to a QP problem, our work is built on some results in [3, 1].

**Organization.** In § 2, we present a unified optimization framework for learning and interventions in games. § 3 focuses on the VI layer. We first introduce the methods for forward propagation, including projection methods and a Newton-type method. Then, backward propagation methods based on explicit and implicit differentiation are proposed, and their analytical properties are discussed. In § 4, we provide numerical results, inspired by a few real-world applications, that highlight the capabilities of the proposed framework.

**Notation.** Given a set of scalars  $a_i$  or functions  $f_i(\cdot)$  with  $i$  from a certain indicator set, we denote its vector form as  $a = (a_i)^\top$  and  $f(\cdot) = (f_i(\cdot))^\top$ . We define the Euclidean norm of a vector  $a \in \mathbb{R}^n$  as  $\|a\|$  and the operator norm of a matrix  $A \in \mathbb{R}^{n \times n}$  induced by Euclidean norm as  $\|A\|$ . The inner product of two vectors  $a, b \in \mathbb{R}^n$  is defined as  $\langle a, b \rangle = a^\top b$ . The Jacobian matrix of  $y \in \mathbb{R}^m$  with respect to  $x \in \mathbb{R}^n$  is denoted as  $\partial y / \partial x \in \mathbb{R}^{m \times n}$ .

## 2 End-to-end design and learning in games

### 2.1 Design and learning in games

We model a system comprised of self-interested agents using game theory. Consider a game played by a set of agents  $\mathcal{N}$ , where each agent  $i \in \mathcal{N}$  selects an *action*  $a_i \in \mathcal{A}_i$  and each player’s payoff is determined by a function  $u_i : \mathcal{A} \rightarrow \mathbb{R}$ , where  $\mathcal{A} = \prod_{i \in \mathcal{N}} \mathcal{A}_i$ . The outcome of the game is usually predicted by its Nash equilibrium, where the agents have no incentive to unilaterally deviate from their current *strategies*.

In this paper, we formulate the equilibria of games as parametric VI problems defined below.

**Definition 1** (Parametric VI problem). Given a set  $\mathcal{Z}_\lambda \subseteq \mathbb{R}^n$  and a function  $F_\lambda : \mathcal{Z}_\lambda \rightarrow \mathbb{R}^n$  parameterized by  $\lambda \in \mathcal{L} \subseteq \mathbb{R}^m$ , a parametric VI problem  $\text{VI}(F_\lambda, \mathcal{Z}_\lambda)$  is to find  $z^* \in \mathcal{Z}_\lambda$  such that

$$\langle F_\lambda(z^*), z - z^* \rangle \geq 0, \quad \text{for all } z \in \mathcal{Z}_\lambda. \quad (1)$$

The equilibrium strategy  $z^*$  of various games can be reformulated as the solution to a certain  $\text{VI}(F_\lambda, \mathcal{Z}_\lambda)$ , where  $\mathcal{Z}_\lambda$  is the strategy set and  $F_\lambda$  is derived from the payoff functions according to the underlying game structure. For example, when the agent profile  $\mathcal{N}$  is finite and the action set  $\mathcal{A}_i$  is continuous for all  $i \in \mathcal{N}$ , methods for establishing the equivalence between Nash Equilibrium and VI, as well as the necessary and sufficient conditions, can be found in [47, 53]. If the action set  $\mathcal{A}_i$  is finite, the mixed-strategy Nash equilibrium can be formulated as a VI problem in a similar manner [42]. When the game is placed in a population context, i.e. the agents in  $\mathcal{N}$  are infinitesimal, the equilibrium of game is usually called a Wardrop equilibrium, pioneered by Wardrop’s first principle [63] in the context of road traffic. The equivalence of Wardrop equilibrium and VI was first established by Dafermos [14]. Below we first give an example of the VI formulation of routing game.

**Example 1** (Routing game). Consider a set of agents traveling from source nodes to sink nodes in a graph with nodes  $\mathcal{V}$  and edges  $\mathcal{E}$ . Each agent aims to choose a route to minimize the total cost incurred. Suppose that  $x_e$  is the number of agents choosing edge  $e$ . The generalized cost on each edge can be set as

$$c_{e,s_e,m_e,\beta_e,\gamma}(x_e) = t_{e,s_e}(x_e) + \gamma m_e + \beta_{e,\theta_e}(x_e), \quad (2)$$

where  $t_e$  is the travel time, modeled as a function of  $x_e$  and the road capacity  $s_e$ ;  $\gamma$  is the time value of money;  $m_e$  is a monetary cost; and  $\beta_e$ , parameterized by  $\theta_e$ , represents the “hidden” cost that is difficult to measure (e.g., comfort, safety). Denote  $\mathcal{X}$  as the set of feasible edge flows satisfying the flow conservation conditions, then the Wardrop equilibrium is equivalent to a VI problem [14]: find  $x^* \in \mathcal{X}$  such that

$$\langle c_{s,m,\theta,\gamma}(x^*), x - x^* \rangle \geq 0, \quad \text{for all } x \in \mathcal{X}. \quad (3)$$

From the above discussion we can see that the equilibrium of a game depends on the payoff functions. Therefore, to induce a target outcome (e.g., one that maximizes “social welfare”) in a game-theoretic system, a central designer can change the payoff functions either by redesigning system parameters or directly through incentives. Before that, the central design must first learn how the agents evaluate the payoff, especially its “hidden” components. To this end, we provide a unified framework for learning and intervention in games as shown in Figure 1, where the equilibrium layer is cast as a VI problem.

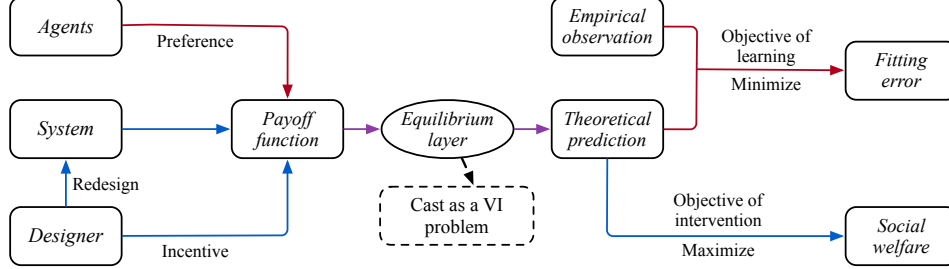

Figure 1: A unified framework for learning and intervention in games.

- The *learning mode* is a regression problem: the designer determines the unknown parameters in agents’ payoff functions by minimizing the fitting loss between empirical observations and theoretical predictions.
- The *intervention mode* is a central design problem: the designer modifies the payoffs through incentives or system redesign to induce a target equilibrium.

**Note.** In many cases, the game designer is expected to design interventions based on learned payoff functions. However, the learning and intervention functions can also be carried out independently. Sometimes, the primary interest is to understand agent behaviors, and hence only the learning mode is needed. Alternatively, when all game inputs are known, the focus would be on intervention.

## 2.2 End-to-end optimization

**Problem formulation.** Both the learning and intervention modes can be formulated as an end-to-end optimization problem given as follows.

$$\begin{aligned} \min_{\lambda} \quad & \bar{R}^* = R(\bar{p}^*) \\ \text{s.t.} \quad & \bar{p}^* = p(\bar{z}, \lambda), \bar{z}^* \text{ solves } \text{VI}(F_{\lambda}, \mathcal{Z}_{\lambda}), \lambda \in \mathcal{L}. \end{aligned} \quad (4)$$

In both modes,  $\bar{z}$  represents the equilibrium strategy, while  $F_{\lambda}$  and  $\mathcal{Z}_{\lambda}$  characterize the setup of game as described in § 2.1. Other variables may have different meanings in the two modes.

- In the *learning mode*,  $\lambda$  represents unobservable parameters in payoff functions. Variable  $\bar{p}$  is the predicted equilibrium system state that can be observed empirically, and the objective  $\bar{R}$  is the fitting loss between  $\bar{p}$  and its observation  $\hat{p}$ . The constraint  $\mathcal{L}$  on  $\lambda$  may be derived from its physical meaning (e.g. the value of time must be non-negative). If the payoff functions are characterized by more complicated constructs (e.g. a deep network), the constraint may be unnecessary.
- In the *intervention mode*,  $\lambda$  represents design parameters. Variable  $\bar{p}$  contains equilibrium system states that dictate social welfare, i.e.  $-\bar{R}$ . The constraint  $\mathcal{L}$  on  $\lambda$  may be related to the financial and/or physical resources available to the central designer.

When the two modes are integrated in an application, the learning mode learns  $\lambda$  in the layer  $\text{VI}(F_{\lambda}, \mathcal{Z}_{\lambda})$  and shares the learned value with the intervention mode. The intervention mode then directly/indirectly changes  $F_{\lambda}$  to induce a target equilibrium. Below we briefly exemplify the learning and intervention problems in a routing game.

**Example 1** (continued). Of the three components in the cost function (2), the monetary cost  $m_e$  is easy to estimate, and the travel time  $t_e$  can be determined from empirical observations, see e.g. the Bureau of Public Roads (BPR) function [11]. The hidden cost function  $\beta_e$ , as well as the value of time  $\gamma$ , however, is usually unknown. If the central designer wants to reduce excessive congestion at

equilibrium, she can either adjust  $s_e$  or change  $m_e$  (e.g., by imposing a toll) for a subset of edges. However, she must first learn  $\theta_e$  and  $\gamma$  in order to correctly anticipate the overall impact of her action on the generalized cost.

- In the learning mode, decision variables include  $\gamma$  and  $\theta_e$ . Denote the equilibrium flow on edge  $e$  predicted by (3) as  $\bar{x}_e^*$ . Suppose that  $\hat{E}$  is the set of edges where the flow can be observed. Then the system states used for fitting are the predicted flow  $\bar{x}_e$  and the corresponding observed flow  $\hat{x}_e$  for  $e \in \hat{E}$ . The objective can be the squared loss  $\bar{R} = \sum_{e \in \hat{E}} (\bar{x}_e^* - \hat{x}_e)^2$ .
- In the intervention mode, the decision variables are  $s_e$  and/or  $m_e$ . The social welfare can be measured by the total travel delay, which is determined by the predicted flow  $\bar{x}_e^*$  and travel time  $t_{e,s_e}(\bar{x}_e^*)$  on each edge  $e$ . Here, the objective is the total time costs  $\bar{R} = \sum_{e \in E} t_{e,s_e}(\bar{x}_e^*) \cdot \bar{x}_e^*$ .

**Gradient descent method.** In this paper, we aim to solve (4) using gradient descent methods. At the current point  $\lambda^k$ , in the *forward propagation*, we need to compute  $\bar{R}^k = L(p_\lambda^k)$ , where  $p_\lambda^k = p(\bar{z}^k, \lambda^k)$  and  $\bar{z}^k$  is the solution to  $\text{VI}(F_{\lambda^k}, \mathcal{Z}_{\lambda^k})$ . While in the *backward propagation*, we need to update  $\lambda^k$  in the opposite direction of the gradient of the objective function, specifically

$$\frac{\partial \bar{R}^k}{\partial \lambda^k} = \nabla R(p_\lambda^k) \cdot \left( \nabla_z p(\bar{z}^k, \lambda^k) \cdot \frac{\partial \bar{z}^k}{\partial \lambda^k} + \nabla_\lambda p(\bar{z}^k, \lambda^k) \right). \quad (5)$$

### 3 Differentiable VI layer

#### 3.1 Fixed-point formulation of VI

A VI problem can be equivalently formulated as a fixed-point problem via a projection operator [26].

**Definition 2** (Projection operator). The projection operator  $\mathcal{P}_{\mathcal{Z}}$  with respect to the Euclidean norm is defined as

$$\mathcal{P}_{\mathcal{Z}}(y) = \arg \min_{y^* \in \mathcal{Z}} \|y^* - y\|. \quad (6)$$

**Proposition 1** (Fixed-point formulation of VI [26]). The point  $z^* \in \mathcal{Z}_\lambda$  is a solution to  $\text{VI}(F_\lambda, \mathcal{Z}_\lambda)$  if and only if for any  $r > 0$ ,  $z^*$  is a fixed point of the mapping  $h_\lambda(z) : \mathcal{Z}_\lambda \rightarrow \mathcal{Z}_\lambda$  defined as

$$h_\lambda(z) = \mathcal{P}_{\mathcal{Z}_\lambda}(z - rF(z, \lambda)). \quad (7)$$

Proposition 1 implies that finding a solution to  $\text{VI}(F_\lambda, \mathcal{Z}_\lambda)$  is equivalent to finding a fixed point of  $h_\lambda(z)$ . The projection operator  $\mathcal{P}_{\mathcal{Z}_\lambda}(y)$  is denoted as  $g_\lambda(y)$  hereafter in this paper and the scalar  $r$  is omitted in  $g_\lambda(y)$  for simplicity.

Based on the fixed-point formulation, the existence and uniqueness conditions of  $\text{VI}(F_\lambda, \mathcal{Z}_\lambda)$  can be established under certain monotone conditions of  $F_\lambda$  [22, 38]. See Appendix A for more details. In the sequel, we make the following assumptions, under which  $\text{VI}(F_\lambda, \mathcal{Z}_\lambda)$  has at least one solution, as well as some other properties for further analysis.

**Assumption 1.** The function  $F_\lambda$  is continuous differentiable and monotone for all  $\lambda \in \mathcal{L}$ .

**Assumption 2.** The set  $\mathcal{Z}_\lambda$  is a bounded polyhedral set for all  $\lambda \in \mathcal{L}$ .

**Assumption 3.** The mapping  $(y, \lambda) \mapsto g_\lambda(y)$  is continuously differentiable.

#### 3.2 Forward propagation

##### 3.2.1 Projection method

The fixed-point formulation of VI implies that one may iteratively project  $z$  to  $h_\lambda(z)$  until a fixed point is found. Such an idea leads to a class of algorithms for solving VI problems, known as the projection method. A sufficient condition for convergence is established by Dafermos [15].

**Proposition 2** (Convergence conditions for the projection method [15]). Starting with  $z^0 \in \mathcal{Z}_\lambda$ , the sequence generated by  $z^{k+1} = h_\lambda(z^k)$  converges to  $\text{VI}(F_\lambda, \mathcal{Z}_\lambda)$  if

$$\|I - r \cdot \nabla_z F_\lambda(z)\| < 1, \quad \text{for all } z \in \mathcal{Z}_\lambda. \quad (8)$$

If  $F_\lambda$  is strictly monotone, the convergence condition (8) is satisfied as long as  $r$  is sufficiently small. However, when  $F_\lambda$  is monotone but not strictly monotone, such a condition sometimes is not satisfied for all  $r > 0$ . In this case, provided that  $F_\lambda$  is co-coercive with module  $c$  on  $\mathcal{Z}_\lambda$ , the sequence also globally converges to the solution to  $\text{VI}(F_\lambda, \mathcal{Z}_\lambda)$  if  $r < 2c$ . See [39] for more details. In the sequel, we also make the following assumption.

**Assumption 4.** For all  $\lambda \in \mathcal{L}$ , there exists  $c > 0$  such that the function  $F_\lambda$  is co-coercive with module  $c$  on  $\Omega_\lambda$ .

Under Assumptions 1 and 4, a sufficiently small  $r$  can guarantee convergence for projection methods.

The rate of convergence of the projection method is typically linear [8], while better results can be obtained if we scale  $z^k$  at each iteration by a positive definite matrix  $G^k$  containing first derivative information of  $F_\lambda(z^k)$  (in which case it may be viewed as a variant of the Newton's method [8]). In the latter case, finding a suitable  $G^k$  is often a nontrivial task.

### 3.2.2 Newton's method

Finding a solution of  $\text{VI}(F_\lambda, \mathcal{Z}_\lambda)$  is equivalent to finding a root of the following equation

$$e_\lambda(z) = z - h_\lambda(z) = 0. \quad (9)$$

Now we are ready to present one of our main contributions, a Newton-type method that solves VI problem by directly locating the solution through root-finding. Firstly, as both  $g_\lambda(y)$  and  $F_\lambda(z)$  are continuously differentiable per assumption,  $e_\lambda(z)$  is also continuously differentiable based on the chain rule. At the point  $z^k$ , the Newton direction  $d^k$  can be found by solving

$$\nabla_z e_\lambda(z^k) \cdot d^k = e_\lambda(z^k). \quad (10)$$

Denote  $y^k = z^k - rF_\lambda(z^k)$ , then

$$\nabla_z e_\lambda(z^k) = I - \nabla_y g_\lambda(y^k) \cdot (I - r \cdot \nabla_z F_\lambda(z^k)). \quad (11)$$

To obtain  $\nabla_y g_\lambda(y^k)$ , we need to differentiate through the projection operator  $g_\lambda(y)$ . As  $\mathcal{Z}_\lambda$  is a polyhedral set,  $g_\lambda(y)$  can be converted into a QP problem:

$$\begin{aligned} z^* = \arg \min_z \quad & \frac{1}{2} z^T z - y^T z \\ \text{s.t.} \quad & A_\lambda z \leq b_\lambda, \quad M_\lambda z = q_\lambda. \end{aligned} \quad (12)$$

This allows us to utilize the following result established by Amos and Kolter [3].

**Proposition 3** (Differentiating through a QP problem [3]). In the QP problem (12), denote  $\nu$  and  $\mu \geq 0$  as the dual variables on the equality and the inequality constraints, respectively. Then the derivatives of the optimal solution  $z^*$ ,  $\mu^*$  and  $\nu^*$  satisfy the following linear equations

$$\begin{bmatrix} I & A_\lambda^T & M_\lambda^T \\ \text{diag}(\mu) A_\lambda & \text{diag}(A_\lambda z^* - b_\lambda) & 0 \\ M_\lambda & 0 & 0 \end{bmatrix} \begin{bmatrix} dz^* \\ d\mu^* \\ d\nu^* \end{bmatrix} = \begin{bmatrix} dy - dA_\lambda^T \mu^* - dM_\lambda^T \nu^* \\ -\text{diag}(\mu^*) dA_\lambda z^* + \text{diag}(\mu^*) db_\lambda \\ -dM_\lambda z^* + dq_\lambda \end{bmatrix}. \quad (13)$$

Based on Proposition 3, we can obtain the Jacobian of  $z^*$  with respect to any parameters. To obtain  $\partial z^* / \partial y$ , we can substitute  $dy = I$  and set other differential terms in the right-hand side to zero. In this manner, the Newton direction  $d^k$  can be derived at each iteration. Subsequently, we set

$$z^{k+1} = z^k - d^k, \quad (14)$$

and move to the next iteration. The following theorem establishes the *local* convergence of this iteration.

**Theorem 1** (Local convergence of Newton's method). Suppose that  $\text{VI}(F_\lambda, \mathcal{Z}_\lambda)$  admits a solution  $\bar{z}^*$ . If  $\nabla_z e_\lambda(\bar{z}^*)$  is nonsingular, then there exists a neighborhood  $\mathcal{B}(\bar{z}^*)$  of  $\bar{z}^*$ , such that when starting from  $x^0 \in \mathcal{B}(\bar{z}^*)$ , the sequence generated by (14) converges to  $\bar{z}^*$  superlinearly.

*Proof.* See Appendix B.1 for a detailed proof.  $\square$

To enable global convergence, we can first employ the projection method to get into the neighborhood of the solution to  $\text{VI}(F_\lambda, \mathcal{Z}_\lambda)$ . See Appendix B.2 for a globally convergent algorithm and implementation details.



### 3.3 Backward propagation

#### 3.3.1 Explicit differentiation method

According to Proposition 2, the convergence of the projection method is guaranteed by a sufficiently small  $r$ . Nevertheless, it is usually unnecessary to predetermine  $r$ . Instead, we can dynamically adjust  $r^k$  at each iteration  $k$  such that  $r^k$  satisfies the convergence condition (2) when  $k$  is sufficiently large. Then the sequence generated by  $z^{k+1} = h_\lambda(z^k)$  with  $r^k$  converges to the solution to  $\text{VI}(F_\lambda, \mathcal{Z}_\lambda)$ .

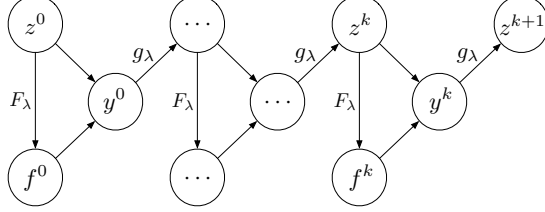

Figure 2: Explicit method.

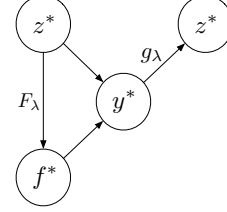

Figure 3: Implicit method.

The computation graph corresponding to this method is given in Figure 2, where  $y^k = z^k - r^k \cdot f^k$  and  $f^k = F_\lambda(z^k)$ . Based on this graph, by viewing the solver of  $\text{VI}(F_\lambda, \mathcal{Z}_\lambda)$  as a collection of an infinite number of projection layers, we are ready to present our first method to differentiate through a VI problem. First, taking the differentials on both sides of  $z^{k+1} = h_\lambda(z^k)$  with respect to  $\lambda$  gives

$$\frac{\partial z^{k+1}}{\partial \lambda} = \nabla_z h_\lambda(z^k) \cdot \frac{\partial z^k}{\partial \lambda} + \nabla_\lambda h_\lambda(z^k), \quad (15)$$

where

$$\nabla_z h_\lambda(z^k) = \nabla_y g_\lambda(y^k) \cdot (I - r^k \cdot \nabla_z F_\lambda(z^k)), \quad (16)$$

$$\nabla_\lambda h_\lambda(z^k) = \nabla_\lambda g_\lambda(y^k) - r^k \cdot \nabla_y g_\lambda(y^k) \cdot \nabla_\lambda F_\lambda(z^k). \quad (17)$$

Based on the recursive equation (15), the Jacobian matrix  $\partial z^*/\partial \lambda$  can be explicitly derived as the limit of  $\partial z^k/\partial \lambda$ . At the core of this method is the computation of  $\nabla_y g_\lambda(y^k)$  and  $\nabla_\lambda g_\lambda(y^k)$ , which can still be obtained by Proposition 3. In the backward propagation, however, it is not necessary to explicitly form  $\nabla_y h_\lambda(z^k)$  and  $\nabla_\lambda h_\lambda(z^k)$ . Instead, the Python library `cvxpylayers`<sup>1</sup> can be used to explicitly build the computation graph with projection (QP) layers and enable backward propagation. See [1] for more details on the package.

#### 3.3.2 Implicit differentiation method

If  $F_\lambda$  is strictly monotone for all  $\lambda \in \mathcal{L}$ , then the solution to  $\text{VI}(F_\lambda, \mathcal{Z}_\lambda)$  is unique. In this case, the function  $z^*(\lambda)$  is directly defined by the fixed-point equation (9), and thus, implicit differentiation can be used to derive  $\partial z^*/\partial \lambda$ . We first give the sufficient conditions for differentiation.

**Proposition 4** (Conditions for differentiation [57]). Suppose that  $\text{VI}(F_\lambda, \mathcal{Z}_\lambda)$  admits a solution  $\bar{z}^*$  at  $\bar{\lambda}$ . If  $F_\lambda(z)$  is strongly monotone in a neighborhood  $\mathcal{B}(\bar{z}^*)$  of  $\bar{z}^*$ , then in a neighborhood  $\mathcal{B}(\bar{\lambda})$  of  $\bar{\lambda}$ , for each  $\lambda \in \mathcal{B}(\bar{\lambda})$ ,  $z^*$  can uniquely defined from the fixed-point equation  $z^* - h_\lambda(z^*) = 0$ , and the function  $z^*(\lambda)$  defined in this way is differentiable.

Under the differentiation conditions, we are ready to present our second method to perform backward propagation through a VI layer.

**Proposition 5** (Implicit backward propagation). Under the conditions in Proposition 4, we have

$$\frac{\partial z^*}{\partial \lambda} = [I - \nabla_z h_\lambda(z^*)]^{-1} \cdot \nabla_\lambda h_\lambda(z^*). \quad (18)$$

If we want to use (18) to compute  $\partial z^*/\partial \lambda$ , then we need to differentiate through the mapping  $h_\lambda(z^*)$ . The computation graph of this method is shown in Figure 3, where  $y^* = z^* - r \cdot f^*$  and  $f^* = F_\lambda(z^*)$ . As  $z^*$  is already the solution to  $\text{VI}(F_\lambda, \mathcal{Z}_\lambda)$ ,  $r$  can be any positive value. The Jacobian matrix  $\nabla_z h_\lambda(z^*)$  and  $\nabla_\lambda h_\lambda(z^*)$  can be obtained using the same method as in the explicit method.

<sup>1</sup><https://github.com/cvxgrp/cvxpylayers>

### 3.3.3 Discussion

The following theorem establishes the equivalence of the explicit differentiation method and the implicit differentiation method under the strongly monotone condition of  $F_\lambda$ .

**Theorem 2** (Equivalence of the two backward propagation methods). Suppose that  $\text{VI}(F_\lambda, \mathcal{Z}_\lambda)$  admits a solution  $\bar{z}^*$  at  $\bar{\lambda}$ . Denoting  $h_\lambda^{(k)}(\cdot)$  as the  $k$ th composition of  $h_\lambda(\cdot)$ , if  $r$  satisfying the convergence condition (8) for  $\bar{\lambda}$ , then for each  $\lambda$  in a neighborhood  $\mathcal{B}(\bar{\lambda})$  of  $\bar{\lambda}$ , the function  $z^\infty(\lambda) = \lim_{k \rightarrow \infty} h_\lambda^{(k)}(z^0)$  is well-defined and is the solution to  $\text{VI}(F_\lambda, \mathcal{Z}_\lambda)$ . If  $F_\lambda(z)$  is strongly monotone in a neighborhood  $\mathcal{B}(\bar{z}^*)$  of  $\bar{z}^*$ , the function  $z^\infty(\lambda)$  is differentiable at  $\bar{\lambda}$ . Moreover, starting from  $\partial z^0(\bar{\lambda})/\partial \lambda = 0$ , the sequence  $\partial z^k(\bar{\lambda})/\partial \lambda$  defined by (15) converges to the Jacobian matrix derived from the implicit differentiation method.

*Proof.* See Appendix C for a detailed proof.  $\square$

**Comparison.** As shown in Figures 2 and 3, the computation graph of the implicit method has a more efficient “depth”. Therefore, when  $F_\lambda$  is strongly monotone, the implicit method is more efficient than the explicit method. However, even though the uniqueness of system-level state (i.e.,  $\bar{p}$  in the general formulation (4)) can be guaranteed under weak conditions, the agent-level strategy (i.e.,  $\bar{z}$  in (4)) is not necessarily unique. It is well-known that this situation may arise in population games where  $F_\lambda$  is monotone but not strongly monotone (hence the term  $I - \nabla_z h_\lambda(z^*)$  in implicit differentiation becomes singular). To deal with this problem, Tobin and Friesz [58] proposed to differentiate by constructing a specific solution that is a nondegenerate extreme point of the solution set. However, getting such a solution is an extra burden in the context of end-to-end optimization, because it is not directly available. The explicit method devised in our paper works in a similar manner by differentiating a specific solution  $z^*$  generated by the projection method. Yet, since finding  $z^*$  is an integrated part of the solution algorithm, no extra effort is needed.

**Extension.** The polyhedral assumption on  $\mathcal{Z}_\lambda$  is sufficient for various equilibrium problems. Nevertheless, the explicit and implicit differentiation methods as well as the Newton’s method can still work as long as  $\mathcal{Z}_\lambda$  is convex. In this case, the method proposed in [2, 1] can be used for differentiating through the projection, which is equivalent to a convex program.

## 4 Numerical experiments

### 4.1 Braess’s paradox

Using the network shown in Figure 4, Braess [10] demonstrates that expanding the capacity of edge 5 would increase the total travel time at the Wardrop’s equilibrium. Assume that the travel demand from node 1 to 4 is  $q$  and the travel time on each edge is given by the BPR function  $t_e(x_e) = T_e \cdot (1 + 0.15 \cdot (x_e/s_e)^4)$ , where  $T_e$  is the free-flow travel time and  $s_e$  is the edge capacity. Figure 5 shows the gradient of the total travel time  $TT = \sum_{e=1}^5 t_e(\bar{x}_e) \cdot \bar{x}_e$  at the equilibrium traffic assignment  $\bar{x}_e$  with respect to  $s_5$  under different travel demand  $q$ , using the implicit, the explicit and the numerical method, respectively. The three methods produce the same results, confirming the recent finding [13] that Braess’s paradox exists when travel demand is neither too low (little congestion) nor too high (too much congestion). For details please refer to Appendix D.1.

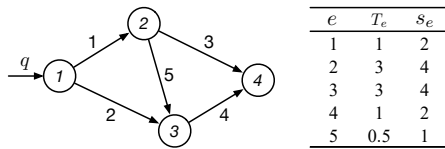

Figure 4: Braess network and its edge parameters.

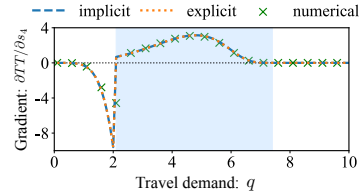

Figure 5: Gradient of total travel time with respect to the capacity on edge 5.



## 4.2 Transportation system operation in a learning-to-design manner

We then test our methods on a linear city model (Figure 6), where each node represents a business or a residential area. The nodes are linked by roads (driving) and also supported by public transport services (riding). Citizens travel between nodes everyday and we model the choices of citizens using the routing game. To consider the choice of modes and routes simultaneously, we split each node into 4 sub-nodes, namely the starting node “s”, the ending node “e”, the driving node “v”, and the riding node “p”. We model the travel costs on driving and riding edges using function (2) in Example 1 and a constant cost on starting edges for public transport, e.g.  $1s \rightarrow 1p$ , to represent the waiting time.

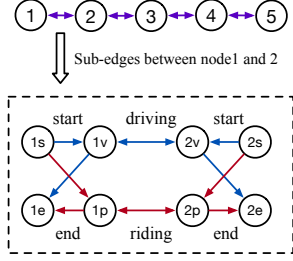

Figure 6: A linear city.

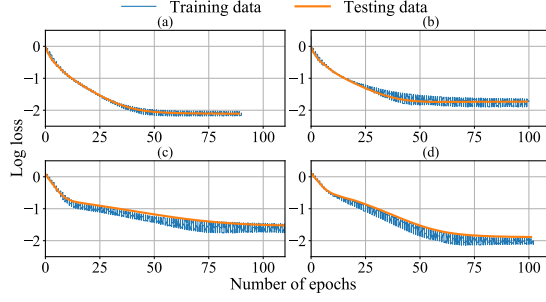

Figure 7: Training process for learning game parameters

**Learning.** We assume that each riding edge  $e$  has a hidden cost  $\beta_{e,q_e,\tau}(x_e) = \tau \cdot (x_e/q_e)^2$ , which indicates the discomfort caused by crowdedness. We first learn  $\tau$ ,  $q_e$  and also  $\gamma$  (time value of money) based on “observed” traffic flows on the driving and riding edges. We randomly generated  $N$  source-sink demand matrices, representing the travel demand in  $N$  different periods. We use the true cost functions to generate observations by finding equilibrium traffic flows, and round them to the nearest 0.1. The model is trained using the stochastic gradient decent method. Figure 7 shows the training process under 4 different hyperparameters settings. We report the losses on log scale for better visualization. For details please refer to Appendix D.2.

**Intervention.** We further study how to regulate the transportation system based on the learned cost functions. To encourage transit ridership—widely promoted for sustainability—we consider imposing a congestion toll on driving edges. Specifically, on each riding edge  $e$ , we design the toll  $\pi_e$  to minimize the total travel time, subject to a constraint that bounds the total cost of crowdedness. We solve the toll optimization problem using the steepest descent method with the Armijo-type line search method. First, as a benchmark, when the true cost functions are used, the total travel time is reduced by 10.21% whereas the total crowdedness cost increases by 15% (the preset upper bound). Then, using the cost functions obtained under one of the the four learning modes (a-d in Figure 7), we find the optimal design and test its performance. The travel time savings and the extra cost of crowdedness for the four learning modes are respectively: (a) 11.05%, 16.47%, (b) 25.79%, 54.27%, (c) 31.38%, 261.48%, (d) 8.38%, 11.95%. For details please refer to Appendix D.2.

## 5 Summary

Over the past decade, artificial intelligence and machine learning have become an increasingly prominent toolbox for understanding social systems [31, 23, 44, 67, 54]. Our work adds into this toolbox a general representation of equilibria of games, and mathematics required to perform forward and backward propagation through it. We hope this work will draw more attention to further developments and applications that could contribute to sustainable development of our shared society.

## Broader Impact

Our work helps understand and resolve social dilemmas resulting from pervasive conflict between self- and collective interest in human societies. The potential applications of the proposed modeling framework range from addressing externality in economic systems to guiding large-scale infrastructure investment. Planners, regulators, policy makers of various human systems could benefit from the decision making tools derived from this work.

## Acknowledgments and Disclosure of Funding

The authors would like to thank the area chair and reviewers for careful reading and constructive suggestions and thank Dr. Liping Zhang, Ruzhang Zhao, Qianni Wang and Lingxiao Wang for providing useful materials and enlightening discussions throughout this project. The research was supported by the US National Science Foundation under the award number CMMI 1922665.

## References

- [1] Agrawal, A., Amos, B., Barratt, S., Boyd, S., Diamond, S., and Kolter, J. Z. (2019a). Differentiable convex optimization layers. In *Advances in Neural Information Processing Systems*, pages 9558–9570.
- [2] Agrawal, A., Barratt, S., Boyd, S., Busseti, E., and Moursi, W. M. (2019b). Differentiating through a cone program. *Journal of Applied and Numerical Optimization*, 1(2):107–115.
- [3] Amos, B. and Kolter, J. Z. (2017). Optnet: Differentiable optimization as a layer in neural networks. In *Proceedings of the 34th International Conference on Machine Learning*, pages 136–145.
- [4] Amos, B., Xu, L., and Kolter, J. Z. (2017). Input convex neural networks. In *Proceedings of the 34th International Conference on Machine Learning*, pages 146–155.
- [5] Basu, K. (1995). Stackelberg equilibrium in oligopoly: an explanation based on managerial incentives. *Economics Letters*, 49(4):459–464.
- [6] Beckmann, M., McGuire, C. B., and Winsten, C. B. (1956). Studies in the economics of transportation. *The Economic Journal*, 67(265):116–118.
- [7] Ben-Akiva, M. E., Lerman, S. R., and Lerman, S. R. (1985). *Discrete choice analysis: theory and application to travel demand*, volume 9. MIT press.
- [8] Bertsekas, D. P. and Gafni, E. M. (1982). Projection methods for variational inequalities with application to the traffic assignment problem. In *Nondifferential and variational techniques in optimization*, pages 139–159. Springer.
- [9] Blum, A., Haghtalab, N., and Procaccia, A. D. (2014). Learning optimal commitment to overcome insecurity. In *Advances in Neural Information Processing Systems*, pages 1826–1834.
- [10] Braess, D. (1968). Über ein paradoxon aus der verkehrsplanung. *Unternehmensforschung*, 12(1):258–268.
- [11] Bureau of Public Roads (1964). *Traffic assignment manual for application with a large, high speed computer*, volume 37. US Department of Commerce, Bureau of Public Roads, Office of Planning.
- [12] Calderone, D. and Sastry, S. S. (2017). Markov decision process routing games. In *2017 ACM/IEEE 8th International Conference on Cyber-Physical Systems*, pages 273–280.
- [13] Colini-Baldeschi, R., Cominetti, R., Mertikopoulos, P., and Scarsini, M. (2020). When is selfish routing bad? the price of anarchy in light and heavy traffic. *Operations Research*, 68(2):411–434.
- [14] Dafermos, S. (1980). Traffic equilibrium and variational inequalities. *Transportation Science*, 14(1):42–54.
- [15] Dafermos, S. (1983). An iterative scheme for variational inequalities. *Mathematical Programming*, 26(1):40–47.
- [16] Dawkin, R. (1976). The selfish gene. *Oxford University Press*, 1:976.
- [17] Domke, J. (2012). Generic methods for optimization-based modeling. In *Artificial Intelligence and Statistics*, pages 318–326.

- [18] Fang, F. (2019). Integrate learning with game theory for societal challenges. In *Proceedings of the 28th International Joint Conference on Artificial Intelligence*, pages 6393–6397.
- [19] Friesz, T. L., Tobin, R. L., Cho, H.-J., and Mehta, N. J. (1990). Sensitivity analysis based heuristic algorithms for mathematical programs with variational inequality constraints. *Mathematical Programming*, 48(1-3):265–284.
- [20] Harari, Y. N. (2014). *Sapiens: A brief history of humankind*. Random House.
- [21] Hardin, G. (1968). The tragedy of the commons. *Science*, 162(3859):1243–1248.
- [22] Hartman, P., Stampacchia, G., et al. (1966). On some non-linear elliptic differential-functional equations. *Acta mathematica*, 115:271–310.
- [23] Jaques, N., Lazaridou, A., Hughes, E., Gulcehre, C., Ortega, P., Strouse, D., Leibo, J. Z., and De Freitas, N. (2019). Social influence as intrinsic motivation for multi-agent deep reinforcement learning. In *International Conference on Machine Learning*, pages 3040–3049.
- [24] Jayakrishnan, R., Tsai, W. T., Prashker, J. N., and Rajadhyaksha, S. (1994). A faster path-based algorithm for traffic assignment. *Transportation Research Record*.
- [25] Jin, W., Wang, Z., Yang, Z., and Mou, S. (2019). Pontryagin differentiable programming: An end-to-end learning and control framework. *arXiv preprint arXiv:1912.12970*.
- [26] Kinderlehrer, D. and Stampacchia, G. (1980). *An introduction to variational inequalities and their applications*, volume 31. Siam.
- [27] Koller, D. and Pfeffer, A. (1997). Representations and solutions for game-theoretic problems. *Artificial Intelligence*, 94(1-2):167–215.
- [28] Koutsoupias, E. and Papadimitriou, C. (1999). Worst-case equilibria. In *Annual Symposium on Theoretical Aspects of Computer Science*, pages 404–413.
- [29] Larsson, T. and Patriksson, M. (1994). A class of gap functions for variational inequalities. *Mathematical Programming*, 64(1-3):53–79.
- [30] Law, L. M., Huang, J., and Liu, M. (2012). Price of anarchy for congestion games in cognitive radio networks. *IEEE Transactions on Wireless Communications*, 11(10):3778–3787.
- [31] Leibo, J. Z., Zambaldi, V., Lanctot, M., Marecki, J., and Graepel, T. (2017). Multi-agent reinforcement learning in sequential social dilemmas. In *Proceedings of the 16th Conference on Autonomous Agents and MultiAgent Systems*, pages 464–473.
- [32] Letchford, J., Conitzer, V., and Munagala, K. (2009). Learning and approximating the optimal strategy to commit to. In *International Symposium on Algorithmic Game Theory*, pages 250–262.
- [33] Ling, C. K., Fang, F., and Kolter, J. Z. (2018). What game are we playing? end-to-end learning in normal and extensive form games. In *Proceedings of the 27th International Joint Conference on Artificial Intelligence*, pages 396–402.
- [34] Lloyd, W. F. (1833). *Two lectures on the checks to population*. Oxford University Press.
- [35] Luo, Z.-Q., Pang, J.-S., and Ralph, D. (1996). *Mathematical programs with equilibrium constraints*. Cambridge University Press.
- [36] Lutter, M., Listmann, K., and Peters, J. (2019). Deep Lagrangian networks for end-to-end learning of energy-based control for under-actuated systems. In *2019 IEEE/RSJ International Conference on Intelligent Robots and Systems*, pages 7718–7725.
- [37] Magnanti, T. L. and Wong, R. T. (1984). Network design and transportation planning: Models and algorithms. *Transportation science*, 18(1):1–55.
- [38] Mancino, O. and Stampacchia, G. (1972). Convex programming and variational inequalities. *Journal of Optimization Theory and Applications*, 9(1):3–23.

- [39] Marcotte, P. and Wu, J. H. (1995). On the convergence of projection methods: application to the decomposition of affine variational inequalities. *Journal of Optimization Theory and Applications*, 85(2):347–362.
- [40] McFadden, D. (1986). The choice theory approach to market research. *Marketing science*, 5(4):275–297.
- [41] McFadden, D. (2001). Economic choices. *American economic review*, 91(3):351–378.
- [42] Mertikopoulos, P. and Zhou, Z. (2019). Learning in games with continuous action sets and unknown payoff functions. *Mathematical Programming*, 173(1-2):465–507.
- [43] Mesterton-Gibbons, M. (2019). *An introduction to game-theoretic modelling*, volume 37. American Mathematical Society.
- [44] Mguni, D., Jennings, J., Sison, E., Valcarcel Macua, S., Ceppi, S., and Munoz de Cote, E. (2019). Coordinating the crowd: Inducing desirable equilibria in non-cooperative systems. In *Proceedings of the 18th International Conference on Autonomous Agents and MultiAgent Systems*, pages 386–394.
- [45] Monderer, D. and Shapley, L. S. (1996). Potential games. *Games and economic behavior*, 14(1):124–143.
- [46] Nagurney, A. (2013). *Network economics: A variational inequality approach*, volume 10. Springer Science & Business Media.
- [47] Nagurney, A. and Zhao, L. (1991). A network equilibrium formulation of market disequilibrium and variational inequalities. *Networks*, 21(1):109–132.
- [48] Parise, F. and Ozdaglar, A. (2019). A variational inequality framework for network games: Existence, uniqueness, convergence and sensitivity analysis. *Games and Economic Behavior*, 114:47–82.
- [49] Patriksson, M. and Rockafellar, R. T. (2002). A mathematical model and descent algorithm for bilevel traffic management. *Transportation Science*, 36(3):271–291.
- [50] Pigou, A. C. (1920). *The economics of welfare*. Palgrave Macmillan.
- [51] Pita, J., Jain, M., Marecki, J., Ordóñez, F., Portway, C., Tambe, M., Western, C., Paruchuri, P., and Kraus, S. (2008). Deployed armor protection: the application of a game theoretic model for security at the los angeles international airport. In *Proceedings of the 7th International Joint Conference on Autonomous Agents and Multiagent Systems: Industrial Track*, pages 125–132.
- [52] Rosenthal, R. W. (1973). A class of games possessing pure-strategy Nash equilibria. *International Journal of Game Theory*, 2(1):65–67.
- [53] Scutari, G., Palomar, D. P., Facchinei, F., and Pang, J.-S. (2010). Convex optimization, game theory, and variational inequality theory. *IEEE Signal Processing Magazine*, 27(3):35–49.
- [54] Shi, Z. R., Wang, C., and Fang, F. (2020). Artificial intelligence for social good: A survey. *arXiv preprint arXiv:2001.01818*.
- [55] Smith, J. M. (1972). Game theory and the evolution of fighting. *On evolution*, pages 8–28.
- [56] Taji, K., Fukushima, M., and Ibaraki, T. (1993). A globally convergent newton method for solving strongly monotone variational inequalities. *Mathematical programming*, 58(1-3):369–383.
- [57] Tobin, R. L. (1986). Sensitivity analysis for variational inequalities. *Journal of Optimization Theory and Applications*, 48(1):191–204.
- [58] Tobin, R. L. and Friesz, T. L. (1988). Sensitivity analysis for equilibrium network flow. *Transportation Science*, 22(4):242–250.
- [59] Train, K. (1998). Recreation demand models with taste variation over people. *Land Economics*, 74(2):230–239.

- [60] Vickrey, W. S. (1969). Congestion theory and transport investment. *The American Economic Review*, 59(2):251–260.
- [61] Von Stackelberg, H. (1934). *Market structure and equilibrium*. Springer Science & Business Media.
- [62] Vorobeychik, Y., Wellman, M. P., and Singh, S. (2007). Learning payoff functions in infinite games. *Machine Learning*, 67(1-2):145–168.
- [63] Wardrop, J. G. (1952). Some theoretical aspects of road traffic research. In *Proceedings of the Institution of Civil Engineers*, volume 1, pages 325–362.
- [64] Yang, H. and H. Bell, M. G. (1998). Models and algorithms for road network design: a review and some new developments. *Transport Reviews*, 18(3):257–278.
- [65] Yang, R., Ford, B., Tambe, M., and Lemieux, A. (2014). Adaptive resource allocation for wildlife protection against illegal poachers. In *Proceedings of the 13th International Conference on Autonomous Agents and MultiAgent Systems*, pages 453–460. Citeseer.
- [66] Zhao, L. and Dafermos, S. (1991). General economic equilibrium and variational inequalities. *Operations Research Letters*, 10(7):369–376.
- [67] Zheng, S., Trott, A., Srinivasa, S., Naik, N., Gruesbeck, M., Parkes, D. C., and Socher, R. (2020). The ai economist: Improving equality and productivity with ai-driven tax policies. *arXiv preprint arXiv:2004.13332*.

## A Existence and uniqueness conditions for VI

We first give the definitions of monotonicity, strictly monotonicity and strongly monotonicity.

**Definition A.1** (Monotone and strictly monotone). A function  $F(z)$  is monotone on  $\mathcal{Z}$  if

$$\langle F(z_1) - F(z_2), z_1 - z_2 \rangle \geq 0, \quad \text{for all } z_1, z_2 \in \mathcal{Z}, \quad (\text{A.1})$$

and strictly monotone if the inequality above is strict.

**Definition A.2** (Strongly monotone). A function  $F(z)$  is strongly monotone on  $\mathcal{Z}$  if for some  $\alpha > 0$ ,

$$\langle F(z_1) - F(z_2), z_1 - z_2 \rangle \geq \alpha \|z_1 - z_2\|^2, \quad \text{for all } z_1, z_2 \in \mathcal{Z}. \quad (\text{A.2})$$

We then give the definitions of positive semi-definiteness, positive definiteness and strongly positive definiteness.

**Definition A.3** (Positive semi-definite and definite). A square matrix  $A \in \mathbb{R}^{n \times n}$  is positive semi-definite if

$$v^\top A v \geq 0, \quad \text{for all } v \in \mathbb{R}^n, v \neq 0, \quad (\text{A.3})$$

and positive definite if the inequality above is strict.

**Definition A.4** (Strongly positive definite). A square matrix  $A \in \mathbb{R}^{n \times n}$  is strongly positive definite if for some  $\alpha > 0$ ,

$$v^\top A v \geq \alpha \|v\|^2, \quad \text{for all } v \in \mathbb{R}^n. \quad (\text{A.4})$$

The following propositions can be used to check whether a matrix is strongly positive definite.

**Proposition A.1.** A square matrix  $A$  is strongly positive definite if and only if  $A^\top + A$  is positive definite.

The monotonicity of  $F(z)$  is closely related to the positive definiteness of  $\nabla F(z)$  [46].

**Proposition A.2.** Suppose that  $F(z)$  is continuously differentiable on  $\mathcal{Z}$  and  $\nabla F(z)$  (need not to be symmetric) is positive semi-definite (positive definite), then  $F(z)$  is monotone (strictly monotone).

**Proposition A.3.** Suppose that  $F(z)$  is continuously differentiable on  $\mathcal{Z}$  and  $\nabla F(z)$  is strongly positive definite, then  $F(z)$  is strongly monotone.

Particularly, if  $\nabla F(x)$  is symmetric, then  $F(x)$  is strongly monotone if and only if  $F(x)$  is strictly monotone.

Eventually, the following propositions provide conditions under which the existence and uniqueness of the solution to  $\text{VI}(F_\lambda, \mathcal{Z}_\lambda)$  are guaranteed [22, 38].

**Proposition A.4** (Existence condition). If  $F_\lambda$  is continuous on  $\mathcal{Z}_\lambda$  and  $\mathcal{Z}_\lambda$  is compact and convex, then  $\text{VI}(F_\lambda, \mathcal{Z}_\lambda)$  admits at least one solution.

**Proposition A.5** (Uniqueness condition). If  $F_\lambda$  is strictly monotone on  $\mathcal{Z}_\lambda$ , then  $\text{VI}(F_\lambda, \mathcal{Z}_\lambda)$  admits a unique solution if one exists. If  $F_\lambda$  is strongly monotone, then it always admits one and only one solution.

## B Details of Newton's method

### B.1 Proof of Theorem 1

*Proof.* As  $e_\lambda(z)$  is continuously differentiable and  $\nabla_z e_\lambda(\bar{z}^*)$  is nonsingular,  $\nabla_z e_\lambda(z)$  is nonsingular in a neighborhood  $\mathcal{B}_1(\bar{z}^*)$  of  $\bar{z}^*$ . Denote  $E^k = \|\nabla_z e_\lambda(z^k)\|$ ,  $y^k = z^k - r F_\lambda(z^k)$ , and  $\bar{y} = \bar{z}^* - r F_\lambda(\bar{z}^*)$ . Starting from  $z^0 \in \mathcal{B}_1(\bar{z}^*)$ , we can recursively get

$$\begin{aligned} \|z^{k+1} - \bar{z}^*\| &= \|z^k - \nabla_z e_\lambda(z^k)^{-1} \cdot e_\lambda(z^k) - \bar{z}^*\| \\ &\leq E^k \cdot \|\nabla_z e_\lambda(z^k) \cdot (z^k - \bar{z}^*) - e_\lambda(z^k)\| \\ &= E^k \cdot \|\nabla_z e_\lambda(z^k) \cdot (z^k - \bar{z}^*) - (e_\lambda(z^k) - e_\lambda(\bar{z}^*))\| \\ &= E^k \cdot \|h_\lambda(z^k) - h_\lambda(\bar{z}^*) - (I - \nabla_z e_\lambda(z^k)) \cdot (z^k - \bar{z}^*)\| \\ &= E^k \cdot \|g_\lambda(y^k) - g_\lambda(\bar{y}) - \nabla_y g_\lambda(y^k) \cdot (I - r \cdot \nabla_z F_\lambda(z^k)) \cdot (z^k - \bar{z}^*)\|. \end{aligned} \quad (\text{B.1})$$



As both  $g_\lambda(y)$  and  $F_\lambda(z)$  are continuously differentiable, denoting  $y = z - rF_\lambda(z)$ , there exists another neighborhood  $\mathcal{B}_2(\bar{z}^*)$  of  $\bar{z}^*$ , such that when  $z \in \mathcal{B}_2(\bar{z}^*)$  we have

$$\begin{aligned} y - \bar{y} &= z - \bar{z}^* - r \cdot (F_\lambda(z) - F_\lambda(\bar{z}^*)) \\ &= (I - r \cdot \nabla F_\lambda(\bar{z}^*)) \cdot (z - \bar{z}^*) + o(\|z - \bar{z}^*\|). \end{aligned} \quad (\text{B.2})$$

Consequently, we have

$$g_\lambda(y) - g_\lambda(\bar{y}) - \nabla_y g_\lambda(y)(y - \bar{y}) = o(\|y - \bar{y}\|) = o(\|z - \bar{z}^*\|). \quad (\text{B.3})$$

Continuing from (B.1), we have

$$\begin{aligned} \|z^{k+1} - \bar{z}^*\| &\leq o(z^k - \bar{z}^*) + E^k \cdot \|\nabla_y g_\lambda(y^k) \cdot (y^k - \bar{y} - (I - r \cdot \nabla_z F_\lambda(z^k)) \cdot (z^k - \bar{z}^*))\| \\ &\leq o(\|z^k - \bar{z}^*\|) + r \cdot E^k \cdot \|\nabla_y g_\lambda(y^k)\| \cdot \|F_\lambda(z^k) - F_\lambda(\bar{z}^*) - \nabla_z F_\lambda(z^k) \cdot (z^k - \bar{z}^*)\| \\ &= o(\|z^k - \bar{z}^*\|) + r \cdot E^k \cdot \|\nabla_y g_\lambda(y^k)\| \cdot o(\|z^k - \bar{z}^*\|) = o(\|z^k - \bar{z}^*\|). \end{aligned} \quad (\text{B.4})$$

Therefore, starting from  $z^0 \in \mathcal{B}_1(\bar{z}^*) \cap \mathcal{B}_2(\bar{z}^*)$ , the sequence converges to  $\bar{z}^*$  superlinearly.  $\square$

## B.2 Implementation details

To enable global convergence, we first use the projection method to find a point within a sufficiently small neighborhood of the solution to  $\text{VI}(F_\lambda, \mathcal{Z}_\lambda)$  and then use the Newton's method to find the solution. Denote  $G(z)$  as the gap (or merit) function to  $\text{VI}(F_\lambda, \mathcal{Z}_\lambda)$ , e.g. [29], a globally convergent method for solving  $\text{VI}(F_\lambda, \mathcal{Z}_\lambda)$  is given in Algorithm 1.

---

### Algorithm 1 Projection-Newton method for solving $\text{VI}(F_\lambda, \mathcal{Z}_\lambda)$ .

---

**Input:** Initial point  $z^0$  and scalar  $r^0$ , tolerance value  $\epsilon_0, \epsilon_1, \delta_0$ , and  $\delta_1$ , control parameters  $0 < \alpha_0 < 1$  and  $\alpha_1 > 1$

- 1: Set  $k = 0$  and  $m^0 = \infty$ .
- 2: **while**  $m^k < \epsilon_0$  **do**
- 3:   Set  $z^{k+1} = g_\lambda(z^k - r^k F(z^k))$  and  $m^{k+1} = G(z^{k+1})$ .
- 4:   Set  $r^{k+1} = \alpha_0 r^k$  if  $m^{k+1}/m^k \geq 1 - \delta_1$ , and  $r^{k+1} = r^k$ , otherwise. Set  $k = k + 1$ .
- 5: **end while**
- 6: **while**  $m^k < \epsilon_1$  **do**
- 7:   Compute  $H^k = \nabla_z e_\lambda(z^k)$  using (11) with  $r^k$ . If  $H^k$  is singular, find  $\eta^k > 0$  such that  $H^k + \eta^k I$  is non-singular. Solve  $(H^k + \eta^k I) \cdot d^k = e_\lambda(z^k)$  and set  $z^{k+1} = z^k - d^k$  and  $m^{k+1} = G(z^{k+1})$ .
- 8:   Set  $r^{k+1} = \alpha_1 r^k$  if  $m^{k+1}/m^k \geq 1 - \delta_2$ , and set  $r^{k+1} = r^k$ , otherwise. Set  $k = k + 1$ .
- 9: **end while**

---

Under Assumptions 1 and 4, a sufficiently small  $r$  can guarantee convergence for projection methods. Therefore, we dynamically reduce  $r$  at each iteration in the projection phase, if the optimality gap does not decrease after the projection. In the Newton's phase, for all positive  $r$ , the solution to  $\text{VI}(F_\lambda, \mathcal{Z}_\lambda)$  satisfies the fixed-point equation (9). Therefore, theoretically, any  $r > 0$  can be used to derive the Newton's direction. In practice, we find that a relatively larger  $r$  can lead to a faster convergence speed. Therefore, we dynamically increase  $r$  when the convergence speed, measured by the decrease of optimality gap after each iteration, is sufficiently small. Meanwhile, if  $\nabla_z e_\lambda(z^k)$  is singular, we modify  $\nabla_z e_\lambda(z^k)$  by adding a correction matrix  $\eta^k I$  to prevent divergence.

## B.3 Additional experiments

We test Algorithm 1 on finding Wardrop's equilibrium. Before the experiments, we first provide some supplementary details of the VI problem given in Example 1. In the graph, denote  $\mathcal{W} \subseteq \mathcal{V} \times \mathcal{V}$  as the set of source-sink pairs and  $\mathcal{K}$  as the set of paths. Suppose that each  $w \in \mathcal{W}$  is associated with  $q_w$  infinitesimal agents. Denote  $f_k$  as the number of agents choosing path  $k \in \mathcal{K}$ . Let  $M$  be the path-demand incidence matrix and  $\Delta$  be the path-edge incidence matrix. Then the feasible region of path flow  $f$  and edge flow  $x$  are  $\mathcal{F} = \{f : f \geq 0, Mf = q\}$  and  $\mathcal{X} = \{x : x = \Delta f, f \in \mathcal{F}\}$ ,

respectively. The Wardrop's equilibrium can be written into the edge-based formulation as in Example 1: find  $x^* \in \mathcal{X}$  such that

$$\langle c(x^*), x - x^* \rangle \geq 0, \quad \text{for all } x \in \mathcal{X}, \quad (\text{B.5})$$

or equivalently, the path-based formulation: find  $f^* \in \mathcal{F}$  such that

$$\langle \Delta^T c(\Delta f^*), f - f^* \rangle \geq 0, \quad \text{for all } f \in \mathcal{F}. \quad (\text{B.6})$$

Here the parameters in  $c(x)$  are omitted for simplicity. We test the algorithms on a two-loop city network as shown in Figure B.1. All edges in the network support the driving mode, while the inner loop and the outer loop of the city are also supported by public transport services. We use the same method as in § 4.2 to model the mode and route choices together (splitting each node into 4 sub-nodes). The cost function  $c_e(x)$  on each edge has the following form

$$c_e(x) = \begin{cases} T_e \left( 1 + \left( \frac{x_e}{s_e} \right)^2 \right) + \gamma m_e + \tau \left( 1 + \left( \frac{x_e}{q_e} \right)^2 \right), & \text{for driving and riding edges,} \\ w_e, & \text{for starting edges.} \end{cases} \quad (\text{B.7})$$

We set  $\gamma = 1$  and  $\tau = 1$ ; the value of parameters are given in Table B.1. The travel demands are generated from independent and identically distributed uniform  $U(5, 10)$  distributions. We compare the convergence speed of three methods for finding equilibrium: the gradient-projection (GP) method [24], the projection-Newton (PN) method and the projection method.

- GP method. The GP method is a *specially* designed method that is widely used to find Wardrop's equilibrium. See [24] for more details.
- PN method (Algorithm 1). We implement the PN method on the path-based formulation (B.6) instead of the edge-based formulation (B.5) to improve the efficiency. We set  $\epsilon_0 = 10^3$ ,  $\epsilon_1 = 10^{-3}$ ,  $\delta_0 = 10^{-3}$ ,  $\delta_1 = 0.2$ ,  $\alpha_0 = 0.8$ ,  $\alpha_1 = 2$ , and start from  $r^0 = 0.5$ . The Jacobian matrix is derived using the `cvxpylayers` package in Python at each iteration.
- Projection method. We set  $\epsilon_0 = 10^{-3}$  and other parameters same as the projection phase in the PN method.

The initial point  $f^0$  is derived from the all-or-nothing assignment, i.e. all the agents choose the shortest paths according to the costs  $c_e(0)$  for all  $e$ . For the path set  $K$ , it is inefficient and also unnecessary to include all the paths at the beginning. Therefore, the path set  $K$  is augmented at each iteration to include the current shortest paths. The gap function for  $f$  is set as  $G(f) = \langle c(\Delta f), \Delta f - \Delta f \rangle$ , where  $\bar{f}$  is derived from the assignment assuming that all of the agents choose the shortest paths based on the edge costs at  $f$ . We stop the computation after 150 iterations. We test the algorithms under four demand levels (1x, 2x, 3x, and 4x) and the convergence processes are shown in Figure B.2. We see that the PN method is faster than the others. Noted that the GP method is a specialized method for finding Wardrop's equilibrium while the PN method is a general method for solving VIs, this result is a powerful evidence that our Newton's method, directly locating the solution through root-finding, is an efficient method for solving VIs.

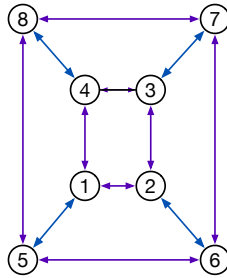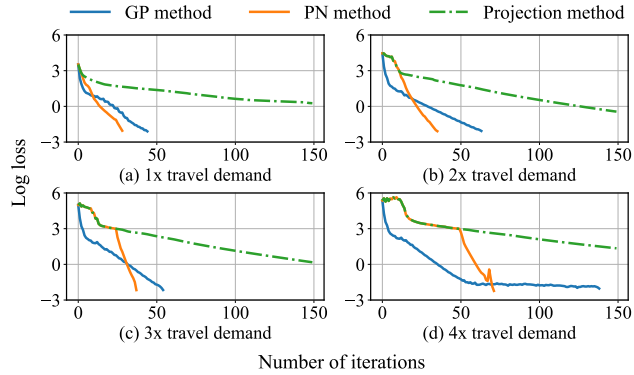

Figure B.1: A two-loop city network.

Figure B.2: Convergence process.

| Mode    | Edge                  | $s_e$    | $T_e$ | $m_e$ | $w_e$ | $q_e$    |
|---------|-----------------------|----------|-------|-------|-------|----------|
| Driving | v-v (inner loop)      | 10       | 0.833 | 0.167 | -     | $\infty$ |
|         | v-v (outer loop)      | 12       | 2.000 | 0.400 | -     | $\infty$ |
|         | v-v (radial edges)    | 15       | 0.700 | 0.140 | -     | $\infty$ |
|         | s-v                   | -        | -     | -     | 0     | -        |
| Riding  | p-p (inner loop)      | $\infty$ | 0.917 | 0.023 | -     | 20       |
|         | p-p (ouner loop)      | $\infty$ | 2.200 | 0.055 | -     | 25       |
|         | s-p (from inner loop) | -        | -     | -     | 1     | -        |
|         | s-p (from outer loop) | -        | -     | -     | 3     | -        |

Table B.1: Edge parameters of the two-loop city network.

## C Proof of Theorem 2

*Proof.* For each  $\lambda$ , the function defined as the limiting point of the projection method is

$$z^\infty(\lambda) = \lim_{k \rightarrow \infty} z^k(\lambda) = \lim_{k \rightarrow \infty} h_\lambda^{(k)}(z^0). \quad (\text{C.1})$$

As  $F_\lambda(z)$  is continuously differentiable and  $r$  satisfies the convergence condition (8) for  $\bar{\lambda}$ , there exists a neighborhood  $\mathcal{B}_1(\bar{\lambda})$  of  $\bar{\lambda}$  such that

$$\|I - r \cdot \nabla_z F_\lambda(z)\| < 1, \quad \text{for all } z \in \mathcal{Z}_\lambda, \text{ and } \lambda \in \mathcal{B}_1(\bar{\lambda}). \quad (\text{C.2})$$

According to Proposition 2, for all  $\lambda \in \mathcal{B}(\bar{\lambda})$ , the sequence  $z^k(\lambda)$  converges to a point  $z^\infty(\lambda)$  which is the solution to  $\text{VI}(F_\lambda, \mathcal{Z}_\lambda)$ . Therefore, the function (C.1) is well defined. If  $F_\lambda(z)$  is strongly monotone, then there exists another neighborhood  $\mathcal{B}_2(\bar{\lambda})$  of  $\bar{\lambda}$  such that for all  $\lambda \in \mathcal{B}_2(\bar{\lambda})$ , the solution to  $\text{VI}(F_\lambda, \mathcal{Z}_\lambda)$  is unique. Then based on Proposition 4,  $z^\infty(\lambda)$  is differentiable in  $\mathcal{B}_1(\bar{\lambda}) \cap \mathcal{B}_2(\bar{\lambda})$ . For all  $z \in \mathcal{Z}_\lambda$  and  $\lambda = \bar{\lambda}$ , the operator norm of  $\nabla_z h_\lambda(z)$  satisfies

$$\|\nabla_z h_\lambda(z)\| \leq \|\nabla_y g_\lambda(y)\| \cdot \|I - r \cdot \nabla_z F_\lambda(z)\| \leq \|I - r \cdot \nabla_z F_\lambda(z)\| < 1, \quad (\text{C.3})$$

where the second inequality holds because  $g_\lambda$  is an Euclidean projection and hence the singular value of  $\nabla_y g_\lambda(y)$  can only be 1 or 0. The convergence of  $\partial \bar{z}^k(\bar{\lambda})/\partial \lambda$  is then guaranteed by the contraction mapping theorem. As we assume that both  $F_\lambda(z)$  and  $g_\lambda(y)$  are continuously differentiable, so is  $h_\lambda(z)$ . As a result, both  $\nabla_z h_\lambda(z)$  and  $\nabla_\lambda h_\lambda(z)$  are continuous. Hence in the recursive equation (15), set  $\lambda = \bar{\lambda}$  and let  $k \rightarrow \infty$ , we get

$$\frac{\partial z^\infty(\bar{\lambda})}{\partial \lambda} = \nabla_z h_\lambda(z^\infty(\bar{\lambda})) \cdot \frac{\partial z^\infty(\bar{\lambda})}{\partial \lambda} + \nabla_\lambda h_\lambda(z^\infty(\bar{\lambda})). \quad (\text{C.4})$$

Therefore, we have

$$(I - \nabla_z h_\lambda(z^\infty(\bar{\lambda}))) \cdot \frac{\partial z^\infty(\bar{\lambda})}{\partial \lambda} = \nabla_\lambda h_\lambda(z^\infty(\bar{\lambda})). \quad (\text{C.5})$$

Eventually, based on Proposition 5, the sequence  $\partial \bar{z}^k(\bar{\lambda})/\partial \lambda$  converges to  $\partial z^\infty(\bar{\lambda})/\partial \lambda$ , which equals the Jacobian matrix derived from the implicit differentiation (18).

□

## D Experimental settings

### D.1 Braess paradox

In this experiment, we test the accuracy of differentiating through a VI problem by quantifying the Braess paradox. We test both the explicit method and the implicit method, and compare the results with the numerical differentiation.

- **Explicit method.** We implement the projection method (equivalently, the projection phase of Algorithm 1) on the path-based formulation (B.6) to find equilibrium. In the forward propagation, we set  $\epsilon_0 = 10^{-4}$ ,  $\delta_0 = 10^{-3}$ ,  $\alpha_0 = 0.8$ , and start from  $r^0 = 0.5$ . We directly build the computation graph using the `cvxpylayers` package.

- **Implicit method.** We use the same equilibrium solution as in the explicit method. Different from using the path-based formulation (B.6) in the forward propagation, we implement implicit differentiation on the edge-based formulation (B.5). We also use the `cvxpylayers` package to compute the Jacobian matrices.
- **Numerical differentiation.** We disturb the capacity by  $+5\%$  and use finite-difference method to compute the gradient.

## D.2 Transportation system operation

In this experiment, we test the performance of our framework on the operation of a transportation system. The cost function has the same form as (B.7), and the parameters are given in Table D.1. Meanwhile, we set  $\gamma = 1$  and  $\tau = 1$ .

| Mode    | Edge                | $s_e$    | $T_e$ | $m_e$ | $w_e$ | $q_e$    |
|---------|---------------------|----------|-------|-------|-------|----------|
| Driving | v-v                 | 10       | 1.0   | 0.25  | -     | $\infty$ |
|         | s-v                 | -        | -     | -     | 0     | -        |
| Riding  | p-p (left to right) | $\infty$ | 1.1   | 0.05  | -     | 18       |
|         | p-p (right to left) | $\infty$ | 1.1   | 0.05  | -     | 22       |
|         | s-p                 | -        | -     | -     | 1     | -        |

Table D.1: Edge parameters of the linear city network.

**Learning.** The number of periods is set as  $N = 8$ . In each period, the travel demands pair are generated from independent and identically distributed uniform  $U(5, 10)$  distributions. We use the first 6 periods for training and the last 2 periods for testing. We use the objective function given in the learning mode of Example 1, assuming that the number of agents (flow) on the driving and riding edges can be observed.

In the forward propagation, we use Algorithm 1 to find equilibrium. We set  $\epsilon_0 = 1$  and  $\epsilon_1 = 10^{-3}$ ; other parameters are the same as in Appendix B.3. In the backward propagation, we use the implicit method on the edge-based formulation (B.5). We consider two types of parameters initialization strategies: ① high riding costs; and ② low riding costs. For ①, we set  $\gamma^0 = 0.2$ ,  $\tau^0 = 1.5$ , and  $q_e^0 = 10$  for all riding edges. For ②, we set  $\gamma^0 = 1.5$ ,  $\tau^0 = 0.2$ , and  $q_e^0 = 30$ . The learning rate for  $\gamma$  and  $q_e$  are set as  $10^{-4}$ , and we consider two learning rates for  $\gamma$ : ①  $10^{-3}$ , and ②  $10^{-4}$ . The 4 hyperparameters settings in Figure 7 are set as (a): ① + ①; (b) ① + ②; (c) ② + ①; (d) ② + ②. The learned value of parameters are given in Table D.2.

|     | $\gamma$ | $\tau$ | $q_e$  |        |        |        |        |        |        |        |
|-----|----------|--------|--------|--------|--------|--------|--------|--------|--------|--------|
|     |          |        | 1-2    | 2-1    | 2-3    | 3-2    | 3-4    | 4-3    | 4-5    | 5-4    |
| (a) | 0.914    | 1.012  | 17.761 | 21.928 | 18.396 | 22.421 | 17.971 | 22.010 | 18.692 | 22.825 |
| (b) | 0.293    | 0.957  | 18.611 | 23.379 | 18.495 | 22.624 | 17.906 | 22.027 | 19.695 | 24.364 |
| (c) | 0.014    | 1.164  | 23.097 | 28.021 | 20.201 | 25.167 | 20.402 | 24.831 | 21.447 | 27.551 |
| (d) | 1.250    | 1.289  | 20.828 | 24.863 | 19.798 | 24.397 | 20.577 | 24.869 | 19.193 | 23.681 |

Table D.2: Learned value of parameters.

According to Figure 7, (a) produces the smallest fitting loss. Based on Table D.2, the learned values in (a) are also the closest to the true values.

**Intervention.** In the forward and backward propagation, we use the same methods as in the learning mode. Based on the learned cost functions in (a), the intervention mode produces similar results compared with the benchmark. The learned cost functions can also be used for other interventions, ranging from network expansions to public transport service pricing and headway design.
